# Supplementary material
Source: MDPI journal article supplement (https://www.mdpi.com/2073-4352/11/12/1500)
Supplement: s1 [file s1]

# Supplementary data

## Synthesis, and Molecular Structure Investigations of a New *s*-Triazine Derivatives Incorporating Pyrazole/Piperidine/Aniline Moieties

Ihab Shawish <sup>1</sup>, Saied M. Soliman <sup>2</sup>, Matti Haukka <sup>3</sup>, Ali Dalbahi <sup>1</sup>, Assem Barakat <sup>1,\*</sup> and  
Ayman El-Faham <sup>2,\*</sup>

<sup>1</sup> Department of Chemistry, College of Science, King Saud University, P. O. Box 2455, Riyadh 11451, Saudi Arabia. ishawish@psu.edu.sa (I.S.); aaldalbahi@ksu.edu.sa (A.D.).

<sup>2</sup> Department of Chemistry, Faculty of Science, Alexandria University, P.O. Box 426, Ibrahimia, Alexandria 21321, Egypt; saied1soliman@yahoo.com & saeed.soliman@alexu.edu.eg (S.M.S), ayman.elfaham@alexu.edu.eg (A. E-F.)

<sup>3</sup> Department of Chemistry, University of Jyväskylä, P.O. Box 35, 40014 Jyväskylä, Finland. matti.o.haukka@jyu.fi (M.H.).

\* Correspondence: Email: ambarakat@ksu.edu.sa (A.B.); aymanel\_faham@hotmail.com (A. E-F.). Tel.: +966-11467-5901 (A.B.); Fax: +966-11467-5992 (A.B.).

### Crystal structure determination

The crystals of **5a** and **5b** were immersed in cryo-oil, mounted in a loop, and measured at a temperature of 120 K. The X-ray diffraction data were collected on a Rigaku Oxford Diffraction Supernova diffractometer using Cu K $\alpha$  radiation. The *CrysAlisPro* [1] software package was used for cell refinements and data reductions. A gaussian (**5a**) or multi-scan (**5b**) absorption correction (*CrysAlisPro*) [1] was applied to the intensities before structure solution. Structures were solved by intrinsic phasing (*SHELXT*) [2] method. Structural refinement was carried out using *SHELXL* [3] software with *SHELXLE* [4] graphical user interface. The NH hydrogen atoms were located from the difference Fourier map and refined isotropically. All other hydrogen atoms were positioned geometrically and constrained to ride on their parent atoms, with C-H = 0.95-0.99 Å and  $U_{iso} = 1.2-1.5 \cdot U_{eq}(\text{parent atom})$ .

### Hirshfeld surface analysis

The topology analyses were performed using Crystal Explorer 17.5 program [5].

### Computational methods

All DFT calculations were performed using Gaussian 09 software package [6,7] utilizing B3LYP/6-31G(d,p) method. Natural bond orbital analyses were performed using NBO 3.1 program as implemented in the Gaussian 09W package [8]. The self-consistent reaction field (SCRF) method [9,10] was used to model the solvent effects when calculated the optimized geometries in solution. Then the NMR chemical shifts for the protons and carbons were computed using GIAO method [11].

**Table S1** The calculated geometric parameters of **5a** and **5b** <sup>a</sup>.

| Parameter | Calc      | Exp      | Parameter |
|-----------|-----------|----------|-----------|
|           | <b>5a</b> |          | <b>5b</b> |
| R(1-19)   | 1.404     | R(1-13)  | 1.913     |
| R(1-20)   | 1.37      | R(2-18)  | 1.401     |
| R(3-20)   | 1.354     | R(2-19)  | 1.371     |
| R(3-21)   | 1.332     | R(3-19)  | 1.334     |
| R(4-21)   | 1.326     | R(3-20)  | 1.352     |
| R(4-22)   | 1.349     | R(4-20)  | 1.36      |
| R(5-20)   | 1.332     | R(4-21)  | 1.464     |
| R(5-22)   | 1.355     | R(4-33)  | 1.463     |
| R(6-7)    | 1.373     | R(5-20)  | 1.352     |
| R(6-21)   | 1.408     | R(5-36)  | 1.334     |
| R(6-23)   | 1.391     | R(6-19)  | 1.349     |
| R(7-30)   | 1.321     | R(6-36)  | 1.327     |
| R(8-22)   | 1.358     | R(7-8)   | 1.374     |
| R(8-35)   | 1.466     | R(7-36)  | 1.407     |
| R(8-47)   | 1.462     | R(7-37)  | 1.392     |
| R(9-11)   | 1.391     | R(8-44)  | 1.32      |
| R(9-19)   | 1.406     | R(9-11)  | 1.39      |
| R(11-13)  | 1.396     | R(9-18)  | 1.406     |
| R(13-15)  | 1.395     | R(11-13) | 1.393     |
| R(15-17)  | 1.395     | R(13-14) | 1.392     |
| R(17-19)  | 1.403     | R(14-16) | 1.394     |
| R(23-24)  | 1.495     | R(16-18) | 1.404     |
| R(23-28)  | 1.373     | R(21-24) | 1.535     |
| R(28-30)  | 1.424     | R(24-27) | 1.535     |

|            |         |            |         |
|------------|---------|------------|---------|
| R(30-31)   | 1.497   | R(27-30)   | 1.535   |
| R(35-38)   | 1.534   | R(30-33)   | 1.535   |
| R(38-41)   | 1.536   | R(37-38)   | 1.495   |
| R(41-44)   | 1.536   | R(37-42)   | 1.372   |
| R(44-47)   | 1.536   | R(42-44)   | 1.424   |
|            |         | R(44-45)   | 1.497   |
| A(2-1-19)  | 115.696 | A(1-13-11) | 119.688 |
| A(2-1-20)  | 111.314 | A(1-13-14) | 119.848 |
| A(19-1-20) | 132.957 | A(18-2-19) | 132.58  |
| A(1-19-9)  | 116.541 | A(18-2-49) | 116.399 |
| A(1-19-17) | 124.418 | A(2-18-9)  | 116.93  |
| A(1-20-3)  | 112.857 | A(2-18-16) | 124.262 |
| A(1-20-5)  | 120.998 | A(19-2-49) | 110.998 |
| A(20-3-21) | 113.503 | A(2-19-3)  | 120.851 |
| A(3-20-5)  | 126.145 | A(2-19-6)  | 112.702 |
| A(3-21-4)  | 126.791 | A(19-3-20) | 114.221 |
| A(3-21-6)  | 116.625 | A(3-19-6)  | 126.446 |
| A(21-4-22) | 114.587 | A(3-20-4)  | 117.741 |
| A(4-21-6)  | 116.583 | A(3-20-5)  | 124.583 |
| A(4-22-5)  | 124.797 | A(20-4-21) | 122.769 |
| A(4-22-8)  | 117.016 | A(20-4-33) | 122.6   |
| A(20-5-22) | 114.172 | A(4-20-5)  | 117.676 |
| A(5-22-8)  | 118.187 | A(21-4-33) | 114.62  |
| A(7-6-21)  | 118.808 | A(4-21-22) | 108.515 |
| A(7-6-23)  | 111.793 | A(4-21-23) | 108.24  |
| A(6-7-30)  | 105.281 | A(4-21-24) | 110.795 |
| A(21-6-23) | 129.399 | A(4-33-30) | 110.691 |
| A(6-23-24) | 126.833 | A(4-33-34) | 108.462 |
| A(6-23-28) | 105.395 | A(4-33-35) | 108.39  |
| A(7-30-28) | 111.25  | A(20-5-36) | 114.468 |
| A(7-30-31) | 120.399 | A(5-36-6)  | 126.796 |
| A(22-8-35) | 121.922 | A(5-36-7)  | 116.731 |
| A(22-8-47) | 123.1   | A(19-6-36) | 113.474 |
| A(35-8-47) | 114.976 | A(6-36-7)  | 116.473 |
| A(8-35-36) | 108.196 | A(8-7-36)  | 118.6   |
| A(8-35-37) | 108.18  | A(8-7-37)  | 111.724 |
| A(8-35-38) | 110.576 | A(7-8-44)  | 105.32  |
| A(8-47-44) | 110.7   | A(36-7-37) | 129.676 |
| A(8-47-48) | 108.577 | A(7-37-38) | 126.903 |
| A(8-47-49) | 108.384 | A(7-37-42) | 105.43  |
| A(10-9-11) | 119.87  | A(8-44-42) | 111.239 |
| A(10-9-19) | 119.449 | A(8-44-45) | 120.435 |
| A(11-9-19) | 120.681 | A(10-9-11) | 119.299 |
| A(9-11-12) | 119.334 | A(10-9-18) | 119.645 |
| A(9-11-13) | 120.355 | A(11-9-18) | 121.056 |
| A(9-19-17) | 119.037 | A(9-11-12) | 120.262 |

|             |         |             |         |
|-------------|---------|-------------|---------|
| A(12-11-13) | 120.311 | A(9-11-13)  | 119.35  |
| A(11-13-14) | 120.477 | A(9-18-16)  | 118.796 |
| A(11-13-15) | 118.965 | A(12-11-13) | 120.387 |
| A(14-13-15) | 120.559 | A(11-13-14) | 120.464 |
| A(13-15-16) | 119.861 | A(13-14-15) | 120.001 |
| A(13-15-17) | 121.385 | A(13-14-16) | 120.235 |
| A(16-15-17) | 118.754 | A(15-14-16) | 119.764 |
| A(15-17-18) | 121.205 | A(14-16-17) | 120.558 |
| A(15-17-19) | 119.577 | A(14-16-18) | 120.098 |
| A(18-17-19) | 119.217 | A(17-16-18) | 119.344 |
| A(24-23-28) | 127.772 | A(22-21-23) | 107.778 |
| A(23-24-25) | 111.905 | A(22-21-24) | 111.906 |
| A(23-24-26) | 108.403 | A(23-21-24) | 109.49  |
| A(23-24-27) | 111.903 | A(21-24-25) | 108.83  |
| A(23-28-29) | 125.907 | A(21-24-26) | 109.117 |
| A(23-28-30) | 106.281 | A(21-24-27) | 111.023 |
| A(25-24-26) | 108.931 | A(25-24-26) | 107.18  |
| A(25-24-27) | 106.719 | A(25-24-27) | 109.873 |
| A(26-24-27) | 108.908 | A(26-24-27) | 110.718 |
| A(29-28-30) | 127.811 | A(24-27-28) | 110.515 |
| A(28-30-31) | 128.351 | A(24-27-29) | 109.18  |
| A(30-31-32) | 111.269 | A(24-27-30) | 110.741 |
| A(30-31-33) | 111.284 | A(28-27-29) | 106.607 |
| A(30-31-34) | 109.828 | A(28-27-30) | 110.483 |
| A(32-31-33) | 107.257 | A(29-27-30) | 109.21  |
| A(32-31-34) | 108.557 | A(27-30-31) | 110.711 |
| A(33-31-34) | 108.545 | A(27-30-32) | 109.782 |
| A(36-35-37) | 108.264 | A(27-30-33) | 111.288 |
| A(36-35-38) | 109.625 | A(31-30-32) | 107.139 |
| A(37-35-38) | 111.896 | A(31-30-33) | 109.068 |
| A(35-38-39) | 109.07  | A(32-30-33) | 108.741 |
| A(35-38-40) | 108.748 | A(30-33-34) | 109.591 |
| A(35-38-41) | 111.286 | A(30-33-35) | 111.604 |
| A(39-38-40) | 107.079 | A(34-33-35) | 108.009 |
| A(39-38-41) | 110.696 | A(38-37-42) | 127.667 |
| A(40-38-41) | 109.849 | A(37-38-39) | 111.934 |
| A(38-41-42) | 110.572 | A(37-38-40) | 108.444 |
| A(38-41-43) | 109.203 | A(37-38-41) | 111.851 |
| A(38-41-44) | 110.781 | A(37-42-43) | 125.905 |
| A(42-41-43) | 106.591 | A(37-42-44) | 106.287 |
| A(42-41-44) | 110.436 | A(39-38-40) | 108.802 |
| A(43-41-44) | 109.15  | A(39-38-41) | 107.016 |
| A(41-44-45) | 109.826 | A(40-38-41) | 108.711 |
| A(41-44-46) | 110.746 | A(43-42-44) | 127.808 |
| A(41-44-47) | 111.154 | A(42-44-45) | 128.326 |
| A(45-44-46) | 107.158 | A(44-45-46) | 111.25  |

|             |         |             |         |
|-------------|---------|-------------|---------|
| A(45-44-47) | 108.746 | A(44-45-47) | 111.243 |
| A(46-44-47) | 109.104 | A(44-45-48) | 109.845 |
| A(44-47-48) | 111.707 | A(46-45-47) | 107.269 |
| A(44-47-49) | 109.534 | A(46-45-48) | 108.566 |
| A(48-47-49) | 107.838 | A(47-45-48) | 108.569 |

<sup>a</sup>Atom numbering refer to **Fig. 5**

**Table S2** The calculated natural charges of **5a** and **5b** <sup>a</sup>.

| Atom      | Charge  | Atom      | Charge  |
|-----------|---------|-----------|---------|
| <b>5a</b> |         | <b>5b</b> |         |
| N1        | -0.5905 | Br1       | 0.0475  |
| H2        | 0.4343  | N2        | -0.5907 |
| N3        | -0.6247 | N3        | -0.6294 |
| N4        | -0.5823 | N4        | -0.4357 |
| N5        | -0.6272 | N5        | -0.6244 |
| N6        | -0.2154 | N6        | -0.5727 |
| N7        | -0.2777 | N7        | -0.2158 |
| N8        | -0.4324 | N8        | -0.2750 |
| C9        | -0.2677 | C9        | -0.2533 |
| H10       | 0.2313  | H10       | 0.2409  |
| C11       | -0.2265 | C11       | -0.2400 |
| H12       | 0.2407  | H12       | 0.2583  |
| C13       | -0.2603 | C13       | -0.1284 |
| H14       | 0.2392  | C14       | -0.2375 |
| C15       | -0.2227 | H15       | 0.2559  |
| H16       | 0.2392  | C16       | -0.2511 |
| C17       | -0.2633 | H17       | 0.2665  |
| H18       | 0.2620  | C18       | 0.1616  |
| C19       | 0.1616  | C19       | 0.6417  |
| C20       | 0.6455  | C20       | 0.6541  |
| C21       | 0.6488  | C21       | -0.2634 |
| C22       | 0.6501  | H22       | 0.2676  |
| C23       | 0.1888  | H23       | 0.2256  |
| C24       | -0.7134 | C24       | -0.4771 |
| H25       | 0.2598  | H25       | 0.2384  |
| H26       | 0.2443  | H26       | 0.2471  |
| H27       | 0.2594  | C27       | -0.4716 |
| C28       | -0.3386 | H28       | 0.2474  |
| H29       | 0.2455  | H29       | 0.2296  |
| C30       | 0.1738  | C30       | -0.4769 |
| C31       | -0.7137 | H31       | 0.2466  |
| H32       | 0.2451  | H32       | 0.2379  |
| H33       | 0.2450  | C33       | -0.2646 |
| H34       | 0.2567  | H34       | 0.2244  |
| C35       | -0.2708 | H35       | 0.2698  |
| H36       | 0.2227  | C36       | 0.6487  |

|     |         |     |         |
|-----|---------|-----|---------|
| H37 | 0.2883  | C37 | 0.1877  |
| C38 | -0.4773 | C38 | -0.7129 |
| H39 | 0.2467  | H39 | 0.2587  |
| H40 | 0.2386  | H40 | 0.2460  |
| C41 | -0.4714 | H41 | 0.2568  |
| H42 | 0.2457  | C42 | -0.3368 |
| H43 | 0.2285  | H43 | 0.2460  |
| C44 | -0.4762 | C44 | 0.1749  |
| H45 | 0.2378  | C45 | -0.7142 |
| H46 | 0.2451  | H46 | 0.2455  |
| C47 | -0.2624 | H47 | 0.2455  |
| H48 | 0.2651  | H48 | 0.2576  |
| H49 | 0.2250  | H49 | 0.4431  |

<sup>a</sup>Atom numbering refer to **Fig. 5**

**Table S3** The calculated and experimental chemical shifts (C.S) for **5a<sup>a</sup>**.

| Atom | (C.S) <sub>calc.</sub> | (C.S) <sub>exp.</sub> | Atom | (C.S) <sub>calc.</sub> | (C.S) <sub>exp.</sub> |
|------|------------------------|-----------------------|------|------------------------|-----------------------|
| C9   | 105.169                | 119.910               | H2   | 6.518                  | -                     |
| C11  | 115.983                | 128.900               | H10  | 7.002                  | 7.572                 |
| C13  | 109.025                | 122.855               | H12  | 7.656                  | 7.331                 |
| C15  | 116.622                | 128.900               | H14  | 7.349                  | 7.052                 |
| C17  | 105.431                | 119.910               | H16  | 7.719                  | 7.340                 |
| C19  | 127.359                | 138.970               | H18  | 9.106                  | 7.593                 |
| C20  | 150.901                | 164.780               | H25  | 3.027                  | 2.663                 |
| C21  | 151.212                | 165.041               | H26  | 2.560                  | 2.663                 |
| C22  | 152.106                | 172.190               | H27  | 3.059                  | 2.663                 |
| C23  | 134.117                | 151.310               | H29  | 6.385                  | 6.007                 |
| C24  | 10.831                 | 17.051                | H32  | 2.416                  | 2.331                 |
| C28  | 99.251                 | 110.590               | H33  | 2.420                  | 2.331                 |
| C30  | 138.726                | 143.341               | H34  | 2.342                  | 2.331                 |
| C31  | 7.394                  | 14.100                | H36  | 3.050                  | 3.806                 |
| C35  | 36.630                 | 45.040                | H37  | 5.490                  | 3.808                 |
| C38  | 20.050                 | 25.830                | H39  | 1.838                  | 1.660                 |
| C41  | 18.774                 | 24.810                | H40  | 1.826                  | 1.660                 |
| C44  | 20.152                 | 25.830                | H42  | 2.052                  | 1.707                 |
| C47  | 36.624                 | 45.040                | H43  | 1.825                  | 1.707                 |
|      |                        |                       | H45  | 1.807                  | 1.660                 |
|      |                        |                       | H46  | 1.879                  | 1.660                 |
|      |                        |                       | H48  | 5.211                  | 3.839                 |
|      |                        |                       | H49  | 3.167                  | 3.837                 |

<sup>a</sup>Atom numbering refer to **Fig. 5**

**Table S4** The calculated and experimental chemical shifts for **5b**<sup>a</sup>.

| <b>Atom</b> | <b>(C.S)<sub>calc.</sub></b> | <b>(C.S)<sub>exp.</sub></b> | <b>Atom</b> | <b>(C.S)<sub>calc.</sub></b> | <b>(C.S)<sub>exp.</sub></b> |
|-------------|------------------------------|-----------------------------|-------------|------------------------------|-----------------------------|
| C9          | 106.997                      | 121.575                     | H10         | 7.009                        | 7.440                       |
| C11         | 119.086                      | 131.899                     | H12         | 7.559                        | 7.460                       |
| C13         | 120.660                      | 115.560                     | H15         | 7.597                        | 7.460                       |
| C14         | 119.555                      | 131.899                     | H17         | 9.054                        | 7.440                       |
| C16         | 106.921                      | 121.575                     | H22         | 5.175                        | 3.810                       |
| C18         | 127.005                      | 138.050                     | H23         | 3.108                        | 3.810                       |
| C19         | 151.670                      | 164.460                     | H25         | 1.906                        | 1.645                       |
| C20         | 151.510                      | 164.830                     | H26         | 1.919                        | 1.645                       |
| C21         | 37.386                       | 44.980                      | H28         | 2.084                        | 1.710                       |
| C24         | 20.069                       | 25.807                      | H29         | 1.858                        | 1.710                       |
| C27         | 18.853                       | 24.736                      | H31         | 1.832                        | 1.645                       |
| C30         | 20.061                       | 25.807                      | H32         | 1.836                        | 1.645                       |
| C33         | 37.410                       | 44.980                      | H34         | 3.056                        | 3.810                       |
| C36         | 151.419                      | 164.85                      | H35         | 5.070                        | 3.810                       |
| C37         | 133.694                      | 151.599                     | H39         | 3.048                        | 2.650                       |
| C38         | 11.076                       | 16.300                      | H40         | 2.604                        | 2.650                       |
| C42         | 99.279                       | 110.900                     | H41         | 3.053                        | 2.650                       |
| C44         | 138.907                      | 143.400                     | H43         | 6.397                        | 6.000                       |
| C45         | 7.415                        | 13.700                      | H46         | 2.418                        | 2.310                       |
|             |                              |                             | H47         | 2.417                        | 2.310                       |
|             |                              |                             | H48         | 2.357                        | 2.310                       |
|             |                              |                             | H49         | 6.664                        | -                           |

<sup>a</sup>Atom numbering refer to **Fig. 5**

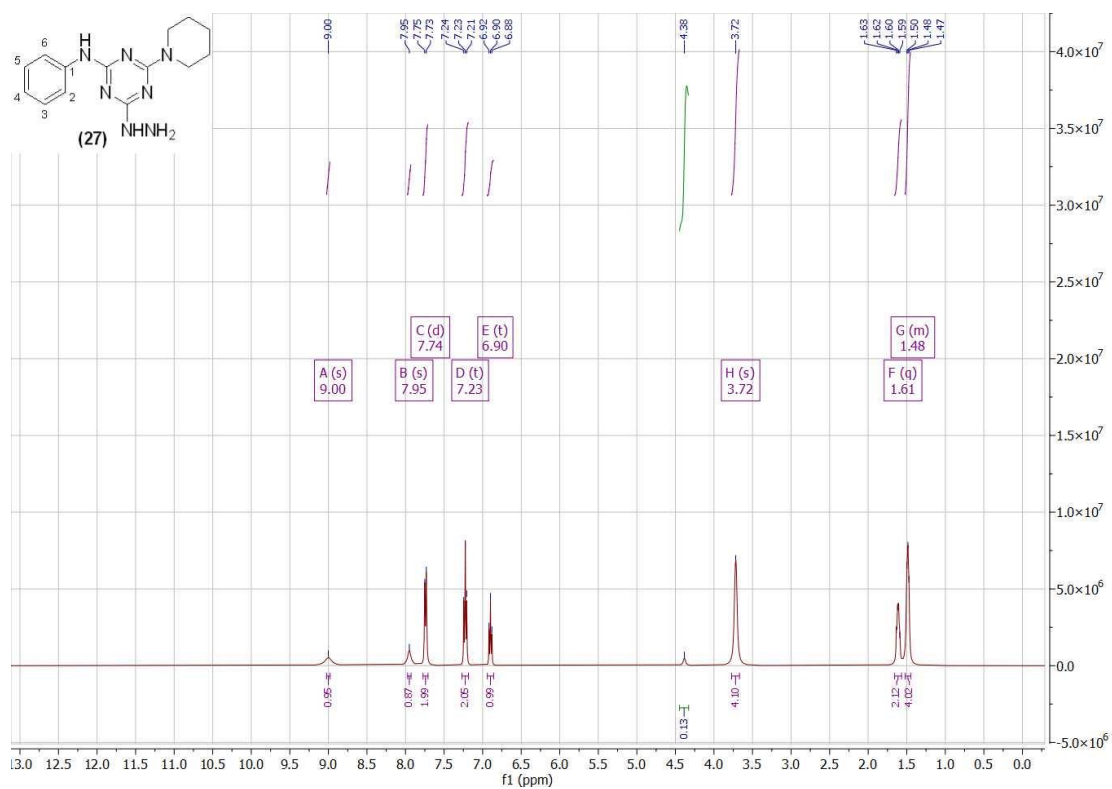

**Figure S1:** <sup>1</sup>H NMR spectrum for compound 4a.

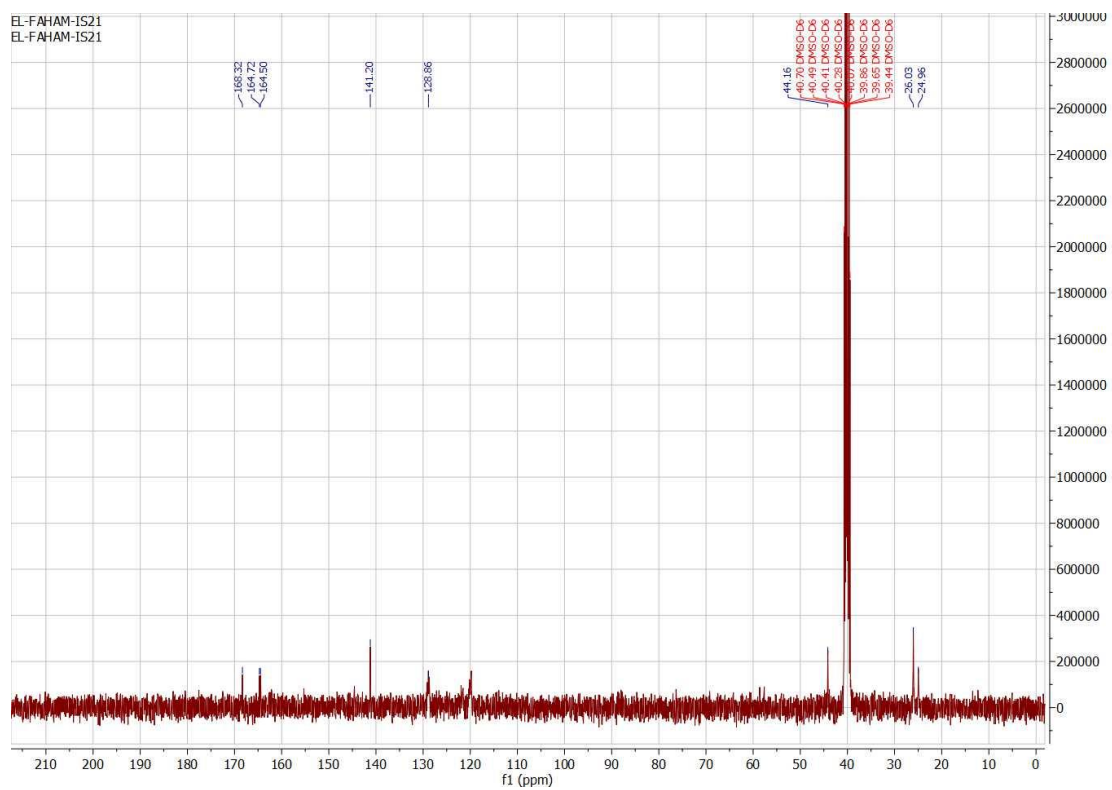

**Figure S2:** <sup>13</sup>C NMR spectrum for compound 4a.



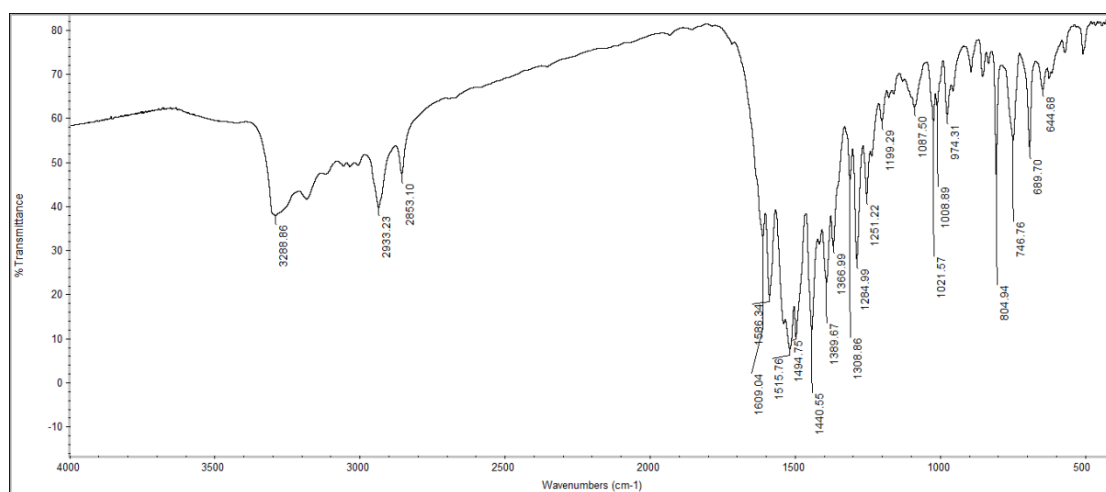

**Figure S3:** IR spectrum for compound **4a**.

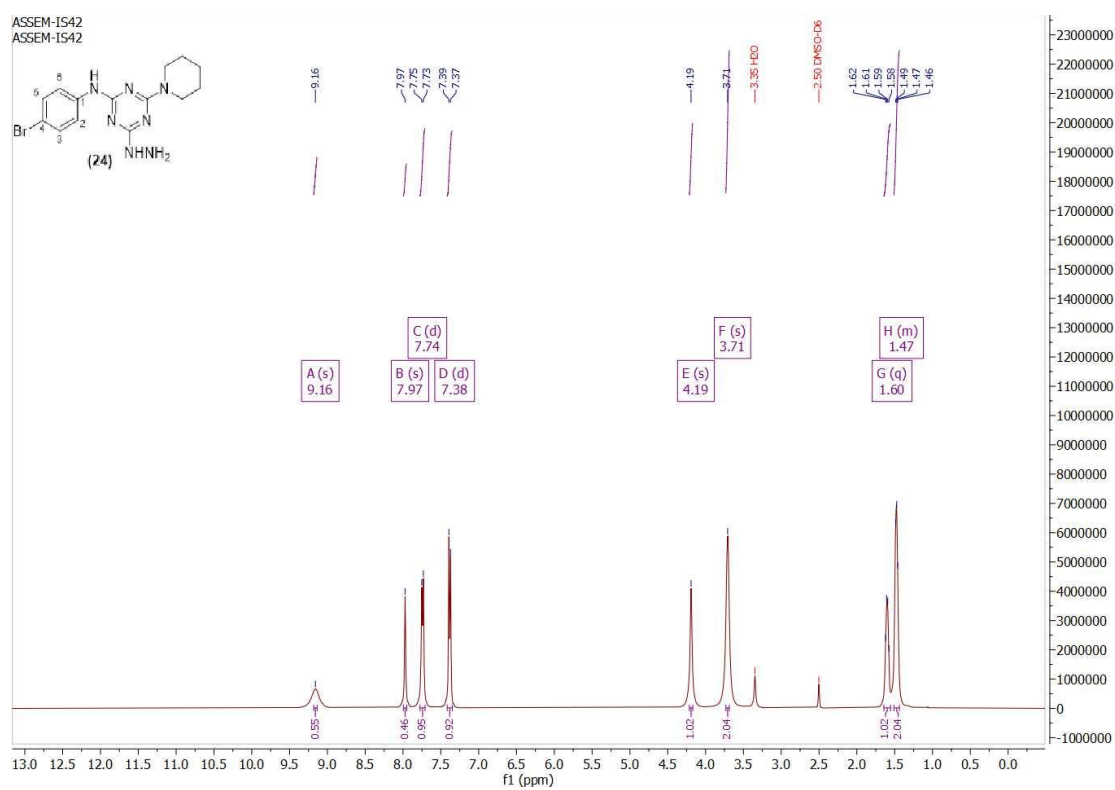

**Figure S4:**  $^1\text{H}$ NMR spectrum for compound **4b**.

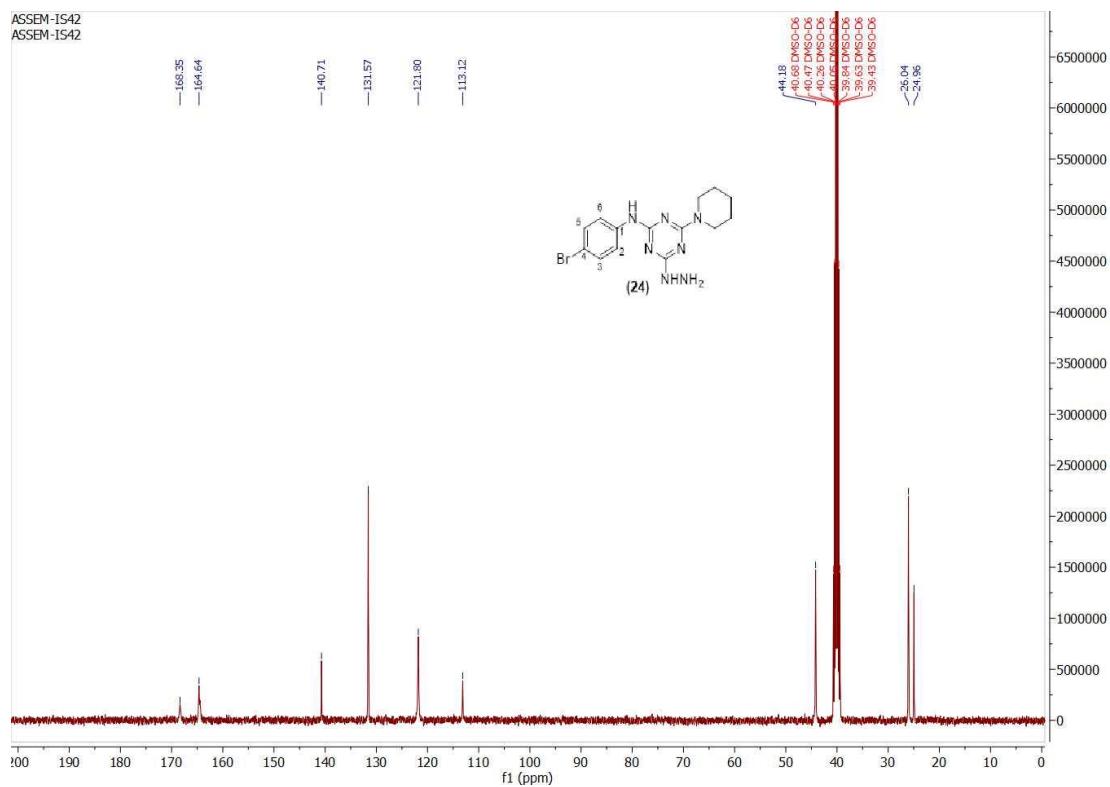

**Figure S5:**  $^{13}\text{C}$ NMR spectrum for compound **4b**.

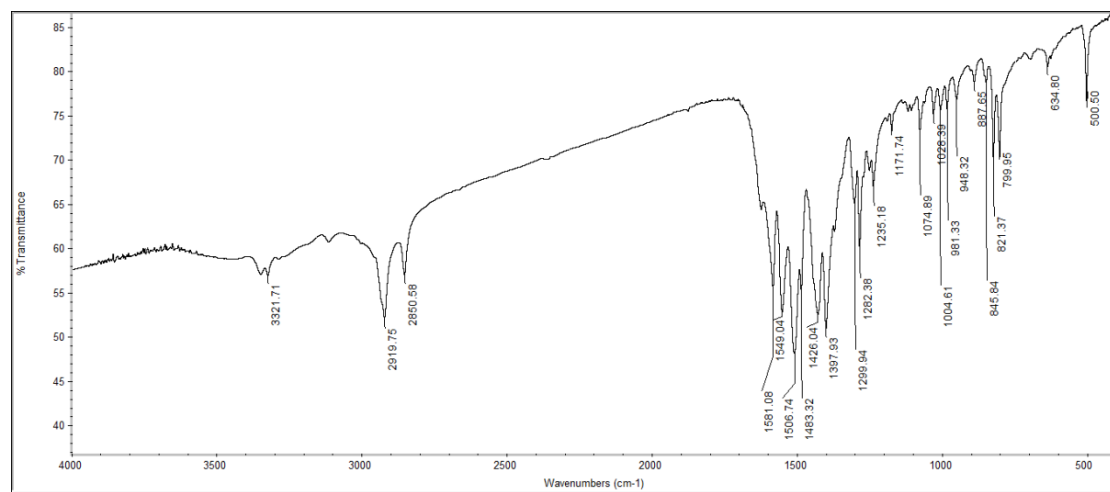

**Figure S6:** IR spectrum for compound **4b**.

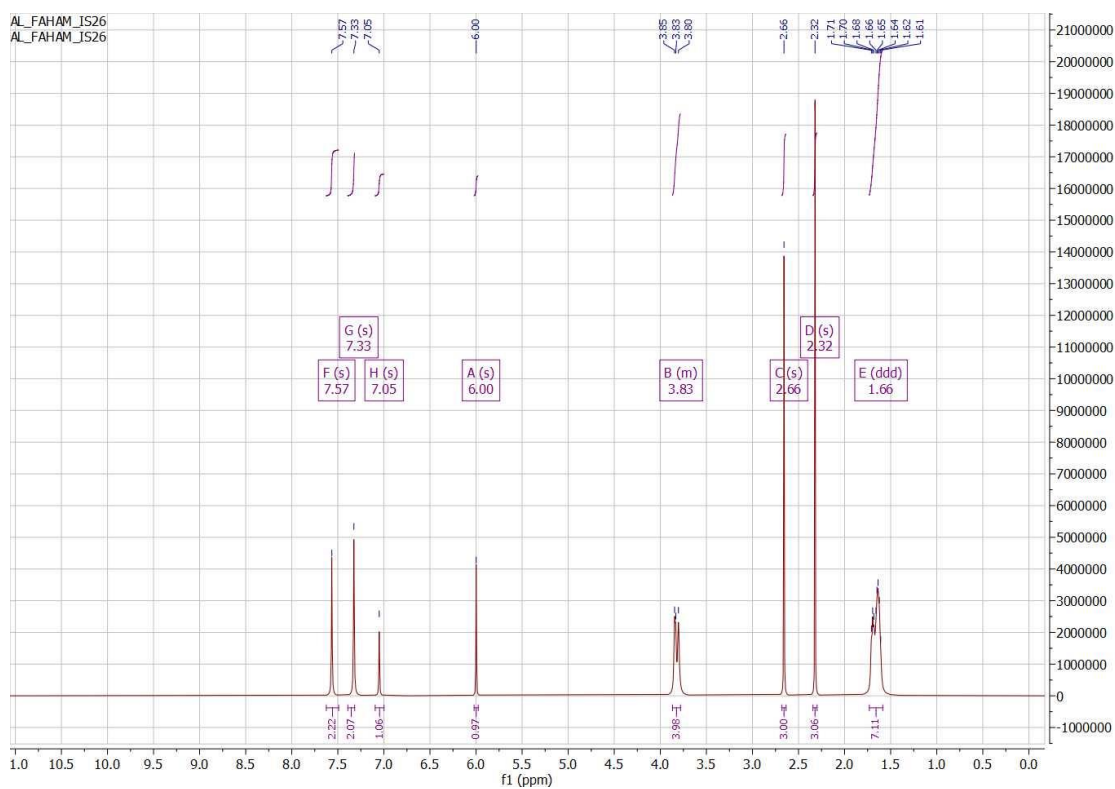

**Figure S7:**  $^1\text{H}$ NMR spectrum for compound **5a**.

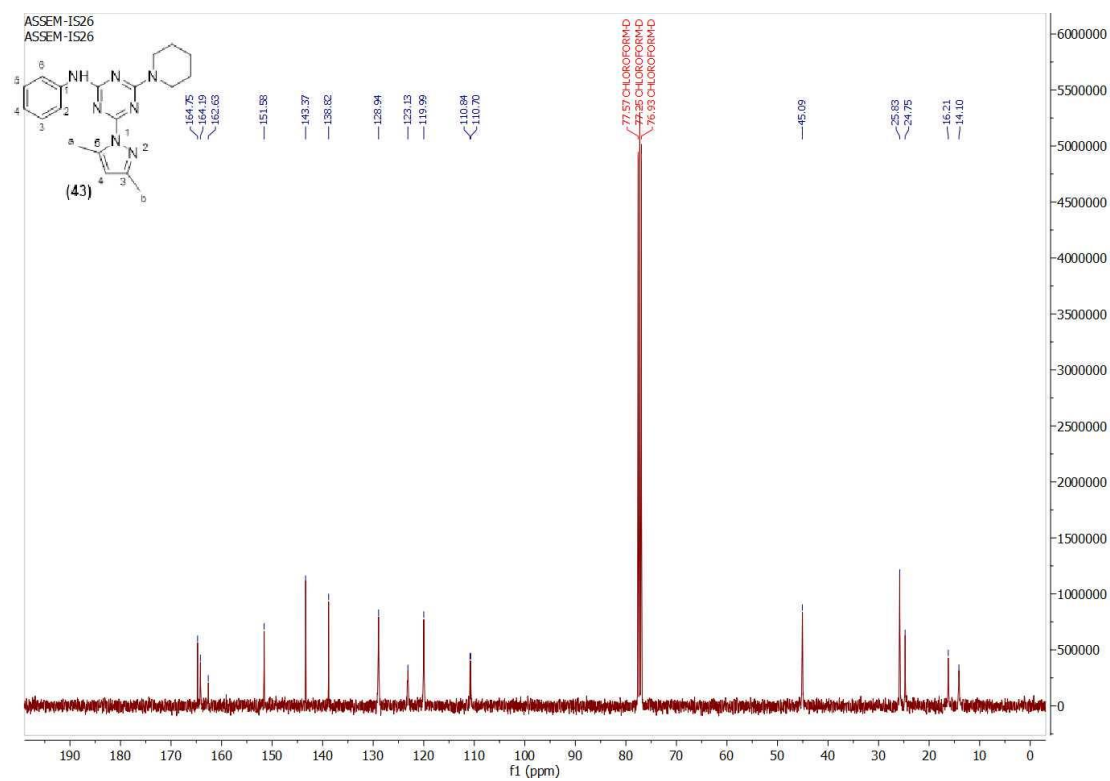

**Figure S8:**  $^{13}\text{C}$ NMR spectrum for compound **5a**.

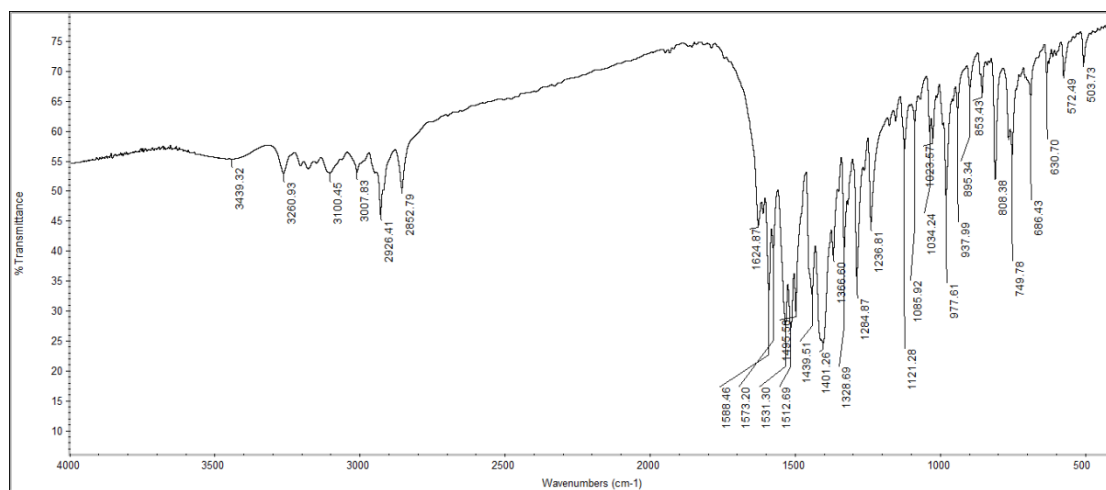

**Figure S9:** IR spectrum for compound 5a.

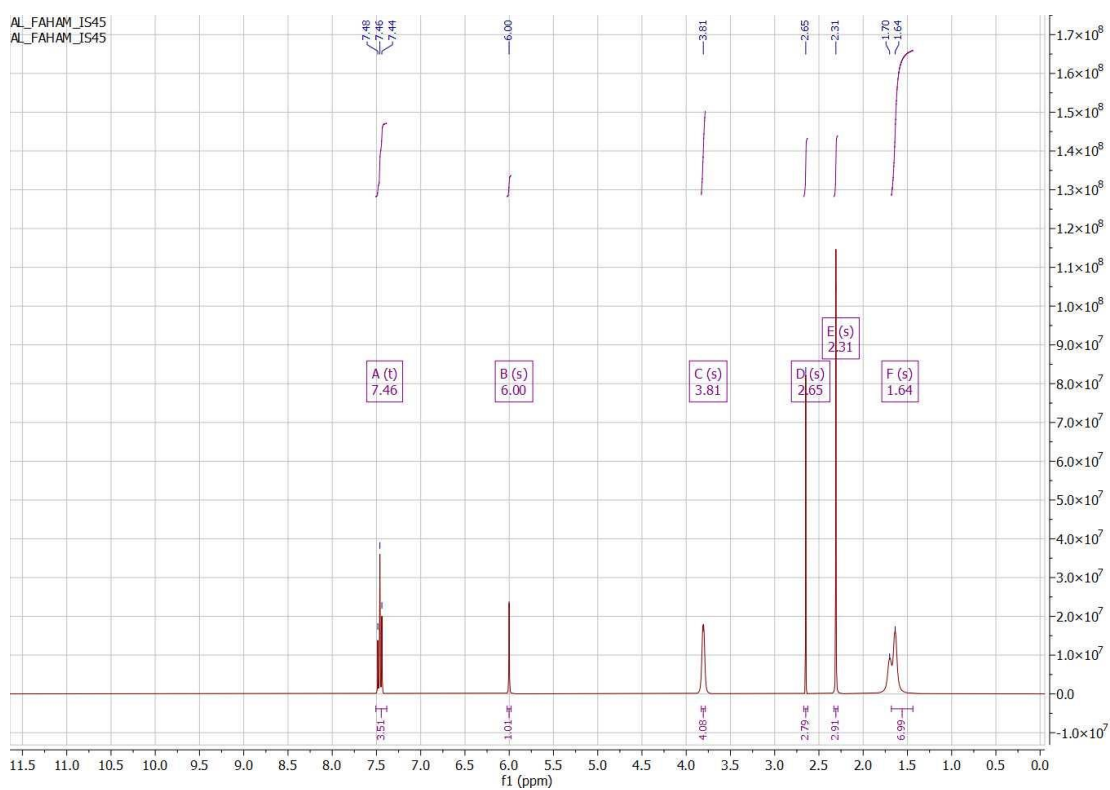

**Figure S10:** <sup>1</sup>H NMR spectrum for compound 5b.

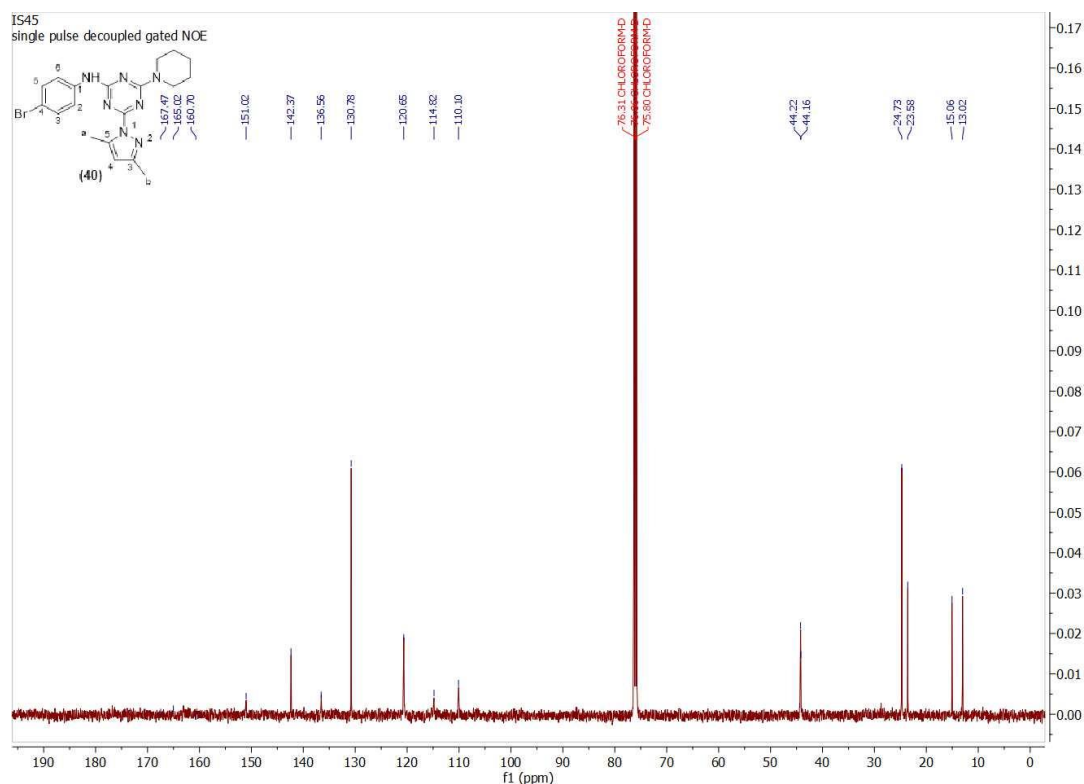

**Figure S11:** <sup>13</sup>CNMR spectrum for compound **5b**.

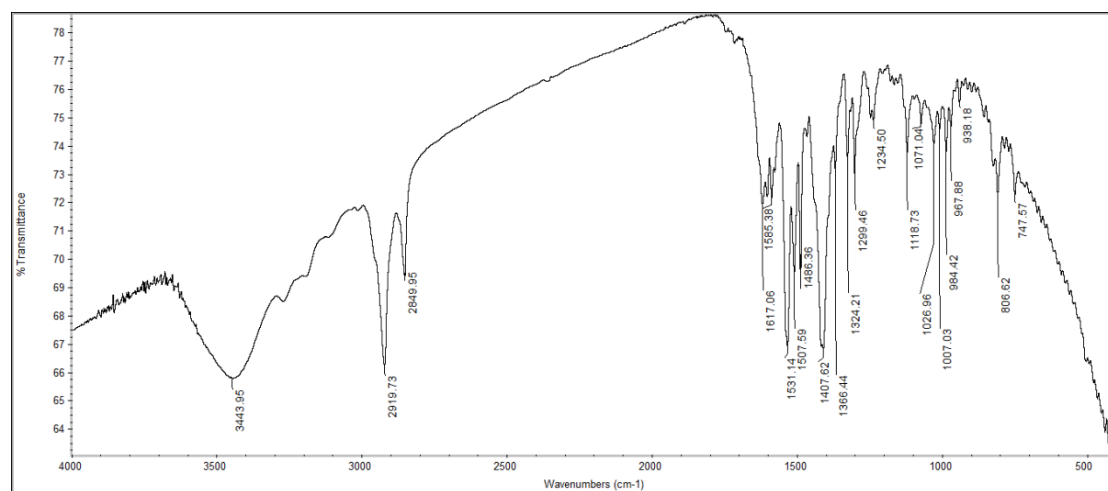

**Figure S12:** IR spectrum for compound **5b**.

## References

1. Rikagu Oxford Diffraction, *CrysAlisPro*, Agilent Technologies inc., Yarnton, Oxfordshire, England, 2020.
2. Sheldrick, G. M. SHELXT – Integrated space-group and crystal-structure determination. *Acta Cryst.* **2015**, A71, 3-8.
3. Sheldrick, G. M. Crystal structure refinement with SHELXL. *Acta Cryst.* **2015**, C71, 3-8.

4. Hübschle, C. B.; Sheldrick, G. M.; Dittrich. ShelXle: a Qt graphical user interface for SHELXL. *B. J. Appl. Cryst.* **2011**, *44*, 1281-1284.
5. Turner, M. J.; McKinnon, J. J.; Wolff, S. K.; Grimwood, D. J.; Spackman, P. R.; Jayatilaka, D.; Spackman, M. A. Crystal Explorer17, University of Western Australia, 2017, <http://hirshfeldsurface.net>.
6. Frisch, M.J.; Trucks, G.W.; Schlegel, H.B.; Scuseria, G.E.; Robb, M.A.; Cheeseman, J.R.; Scalmani, G.; Barone, V.; Mennucci, B.; Petersson, G.A.; *et al.* GAUSSIAN 09; Revision A02; Gaussian Inc.: Wallingford, CT, USA, 2009.
7. GaussView; Version 4.1; Dennington II, R., Keith, T., Millam, J., Eds.; Semichem Inc.: Shawnee Mission, KS, USA, 2007.
8. Reed, A.E.; Curtiss, L.A.; Weinhold, F. Intermolecular interactions from a natural bond orbital, donor-acceptor viewpoint. *Chem. Rev.* **1988**, *88*, 899–926.
9. Cheeseman, J.R.; Trucks, G.W.; Keith, T.A.; Frisch, M.J. A Comparison of Models for Calculating Nuclear Magnetic Resonance Shielding Tensors. *J. Chem. Phys.* **1996**, *104*, 5497–5509.
10. Marten, B.; Kim K.; Cortis, C.; Friesner, R. A.; Murphy, R. B.; Ringnalda, M. N.; Sitkoff, D.; Honig, B. New Model for Calculation of Solvation Free Energies: Correction of Self-Consistent Reaction Field Continuum Dielectric Theory for Short-Range Hydrogen-Bonding Effects, *J. Phys. Chem.* 1996, *100*, 11775-11765.
11. Tannor, D.J.; Marten, B.; Murphy, R.; Friesner, R.A.; Sitkoff, D.; Nicholls, A.; Ringnalda, M.; Goddard, W.A.; Honig, B. Accurate first principles calculation of molecular charge distributions and solvation energies from ab initio quantum mechanics and continuum dielectric theory. *J. Am. Chem. Soc.* **1994**, *116*, 11875–11882.
